# Supplementary material for: Observation of internal cleavage and ligation reactions of a ribozyme
Source: Springer Nature journal article supplement (doi:10.1038/nsmb842), 2004-10-10
Supplement: nsmb842-S4.pdf [file nsmb842-S4.pdf]

**Supplementary Figure 4. pH dependence of the apparent cleavage rate**

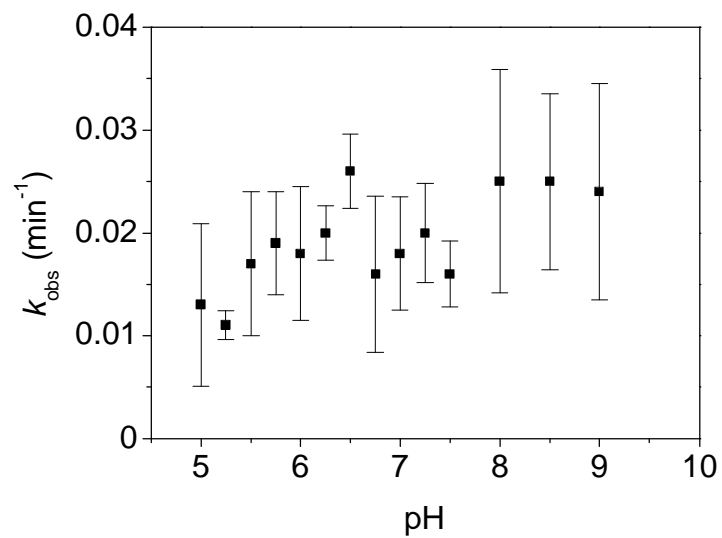

The pH dependence of the slow component of the apparent cleavage rate determined from ensemble kinetic studies.
